# Supplementary material for: On the Impact of the Response Options’ Position on Item Difficulty in Multiple-Choice-Items
Source: Atypon-hosted journal article supplement (doi:10.1027/1015-5759/a000615), 2020-12-04
Supplement: 1015-5759_a000615_esm1.pdf [file 1015-5759_a000615_esm1.pdf]

```
#####
```

```
### Input and Output using R
```

```
#####
```

```
### datrm = items
```

```
### dat = complete data file
```

```
#####
```

```
### person fit index lz*
```

```
#####
```

```
ut.rm<-RM(datrm, se=T)
```

```
personfit.data <- PPass(ut.rm, SE=T)
```

```
personfit.data[personfit.data$lzstar< (-1.96),]
```

```
### exclusion of six persons
```

```
datrm <- datrm[-c(173,228,264,340,506,774),]
```

```
dat <- dat[-c(173,228,264,340,506,774),]
```

```
#####
```

```
### creating split criteria LRT sex and test-taking motivation
```

```
#####
```

```
tk_sex<-dat$sex
```

```
tk_mot <- dat$Fb_it1
```

```
#####
```

```
### rasch model estimation
```

```
#####
```

```
ut.rm <- RM(datrm, se=T)
```

#####

### LRT estimation for split criteria score

#####

(ut.lrt.score<-LRtest(ut.rm,se=T))

Output:

### Andersen LR-test:

### LR-value: 99.187

### Chi-square df: 54

### p-value: 0

qchisq(0.99,54)

Output:

### 81.06877

#####

### z-test for split criteria score

#####

(ut.wald.score<-Waldtest(ut.rm))

Output:

Wald test on item level (z-values):

|           | z-statistic | p-value |
|-----------|-------------|---------|
| beta it2b | -0.142      | 0.887   |
| beta it2c | -0.037      | 0.970   |
| beta it3a | 0.615       | 0.538   |
| beta it3b | -0.389      | 0.697   |
| beta it3c | -1.945      | 0.052   |

|            |        |       |
|------------|--------|-------|
| beta it5a  | -1.066 | 0.286 |
| beta it5c  | -0.873 | 0.383 |
| beta it6a  | -0.050 | 0.960 |
| beta it6b  | 0.256  | 0.798 |
| beta it6c  | 0.678  | 0.498 |
| beta it7a  | -1.404 | 0.160 |
| beta it7b  | -2.177 | 0.030 |
| beta it7c  | 1.636  | 0.102 |
| beta it8a  | 0.653  | 0.514 |
| beta it8b  | -0.549 | 0.583 |
| beta it8c  | -1.476 | 0.140 |
| beta it9a  | -0.360 | 0.719 |
| beta it9b  | -1.129 | 0.259 |
| beta it9c  | -0.773 | 0.439 |
| beta it10a | 1.094  | 0.274 |
| beta it10b | -1.264 | 0.206 |
| beta it10c | -1.386 | 0.166 |
| beta it11a | -1.328 | 0.184 |
| beta it11b | 1.614  | 0.107 |
| beta it11c | 0.262  | 0.793 |
| beta it12a | 0.232  | 0.816 |
| beta it12b | -0.179 | 0.858 |
| beta it12c | 1.431  | 0.152 |
| beta it13a | -0.729 | 0.466 |
| beta it13b | -1.917 | 0.055 |
| beta it13c | -0.944 | 0.345 |
| beta it14a | -0.218 | 0.827 |
| beta it14b | 1.241  | 0.214 |
| beta it14c | -1.122 | 0.262 |
| beta it15a | 0.761  | 0.446 |
| beta it15b | -0.927 | 0.354 |
| beta it15c | 0.659  | 0.510 |

beta it16a 1.590 0.112  
beta it16b 2.544 0.011  
beta it16c -1.006 0.315  
beta it17a -1.002 0.316  
beta it17b -0.037 0.970  
beta it17c 4.261 0.000  
beta it18a 2.036 0.042  
beta it18b -1.655 0.098  
beta it18c -0.530 0.596  
beta it19a 1.701 0.089  
beta it19b 1.372 0.170  
beta it19c -0.953 0.341  
beta it20a 2.992 0.003  
beta it20b -0.684 0.494  
beta it20c 0.020 0.984  
beta it21a 3.305 0.001  
beta it21b 2.669 0.008  
beta it21c 0.523 0.601

#####

### LRT estimation for split criteria motivation

#####

(ut.lrt.mot <- LRtest(ut.rm, se=T, splitcr = tk\_mot)

Output:

### Andersen LR-test:

### LR-value: 54.338

### df: 59

### p-value: 0.648

qchisq(0.99,59)

Output:

### 87.16571

#####

### LRT estimation for split criteria sex

#####

(ut.lrt.sex<-LRtest(ut.rm,splitcr=tk\_sex,se=T))

Output:

### Andersen LR-test:

### LR-value: 91.041

### Chi-square df: 60

### p-value: 0.006

qchisq(0.99,60)

Output:

### 88.37942

#####

### z-test for split criteria sex

#####

(ut.wald.sex<- Waldtest(ut.rm,splitcr=tk\_sex))

Output:

Wald test on item level (z-values):

|           | z-statistic | p-value |
|-----------|-------------|---------|
| beta it1c | 0.335       | 0.738   |

|            |        |       |
|------------|--------|-------|
| beta it2a  | -0.463 | 0.644 |
| beta it2b  | 0.734  | 0.463 |
| beta it2c  | -0.361 | 0.718 |
| beta it3a  | 1.143  | 0.253 |
| beta it3b  | 0.647  | 0.518 |
| beta it3c  | 0.227  | 0.821 |
| beta it4a  | 0.623  | 0.534 |
| beta it4b  | -0.611 | 0.541 |
| beta it4c  | -0.606 | 0.544 |
| beta it5a  | 1.044  | 0.297 |
| beta it5b  | -0.589 | 0.556 |
| beta it5c  | 1.403  | 0.161 |
| beta it6a  | -0.371 | 0.711 |
| beta it6b  | -1.387 | 0.165 |
| beta it6c  | 1.045  | 0.296 |
| beta it7a  | -0.910 | 0.363 |
| beta it7b  | -1.055 | 0.291 |
| beta it7c  | -0.929 | 0.353 |
| beta it8a  | -0.089 | 0.929 |
| beta it8b  | -0.296 | 0.767 |
| beta it8c  | 0.387  | 0.699 |
| beta it9a  | -0.440 | 0.660 |
| beta it9b  | -2.044 | 0.041 |
| beta it9c  | -2.181 | 0.029 |
| beta it10a | 0.904  | 0.366 |
| beta it10b | -0.523 | 0.601 |
| beta it10c | -0.541 | 0.589 |
| beta it11a | 0.592  | 0.554 |
| beta it11b | -0.600 | 0.549 |
| beta it11c | -1.583 | 0.113 |
| beta it12a | -0.538 | 0.590 |
| beta it12b | -0.180 | 0.857 |

|            |        |       |
|------------|--------|-------|
| beta it12c | 1.091  | 0.275 |
| beta it13a | 0.064  | 0.949 |
| beta it13b | 0.591  | 0.555 |
| beta it13c | 1.161  | 0.245 |
| beta it14a | 1.764  | 0.078 |
| beta it14b | -0.280 | 0.780 |
| beta it14c | 1.843  | 0.065 |
| beta it15a | -0.134 | 0.893 |
| beta it15b | -0.998 | 0.318 |
| beta it15c | 0.393  | 0.694 |
| beta it16a | -0.903 | 0.367 |
| beta it16b | 1.683  | 0.092 |
| beta it16c | 0.695  | 0.487 |
| beta it17a | -1.422 | 0.155 |
| beta it17b | -0.783 | 0.434 |
| beta it17c | 0.030  | 0.976 |
| beta it18a | 3.005  | 0.003 |
| beta it18b | 1.753  | 0.080 |
| beta it18c | 0.732  | 0.464 |
| beta it19a | 0.461  | 0.645 |
| beta it19b | 1.400  | 0.162 |
| beta it19c | -1.861 | 0.063 |
| beta it20a | -0.657 | 0.511 |
| beta it20b | -0.811 | 0.417 |
| beta it20c | -0.765 | 0.444 |
| beta it21a | 0.011  | 0.991 |
| beta it21b | -0.165 | 0.869 |
| beta it21c | -0.609 | 0.543 |

```
#####
```

```
### exclusion of 3 items
```

```
#####
```

```
datrm <- datrm[,-c(49:54,61:63)]
```

```
#####
```

```
### rasch model analysis
```

```
#####
```

```
ut.rm2 <- RM(datrm, se=T)
```

```
#####
```

```
### LRT estimation for split criteria score (a-posteriori)
```

```
#####
```

```
(ut.lrt.score2<-LRtest(ut.rm2,se=T))
```

```
Output:
```

```
### Andersen LR-test:
```

```
### LR-value: 43.383
```

```
### Chi-square df: 41
```

```
### p-value: 0.37
```

```
qchisq(0.99, 41)
```

```
Output:
```

```
### 64.95007
```

```
#####
```

```
### LRT estimation for split criteria motivation (a-posteriori)
```

```
#####
```



```
(ut.lrt.mot2 <- LRtest(ut.rm2, se=T, splitcr = tk_mot))
```

Output:

```
### Andersen LR-test:
```

```
### LR-value: 54.274
```

```
### Chi-square df: 59
```

```
### p-value: 0.65
```

```
qchisq(0.99, 59)
```

```
### 87.16571
```

```
#####
```

```
### LRT estimation for split criteria sex (a-posteriori)
```

```
#####
```

```
(ut.lrt.sex2<-LRtest(ut.rm2,splitcr=tk_sex,se=T))
```

Output:

```
### Andersen LR-test:
```

```
### LR-value: 73.931
```

```
### Chi-square df: 51
```

```
### p-value: 0.02
```

```
qchisq(0.99, 51)
```

```
### 77.38596
```

```
#####
```

```
### LLTM-1 estimation
```

```
#####
```

```
### qmatrix
```

```
qr(qmatrix1)
```

```
lltm1 <- LLTM (datrm,qmatrix1)
```

```
cor(ut.rm2$betapar,lltm1$betapar)
```

Output:

```
# 0.9768916
```

```
-2*(lltm1$loglik-ut.rm2$loglik)
```

```
### 48.42851
```

```
## df 54 - 20 - 1
```

```
qchisq(0.99,33)
```

```
### 54.77554
```

```
#####
```

```
### LLTM-2 estimation
```

```
#####
```

```
### qmatrix
```

```
qr(qmatrix2)
```

```
lltm2 <- LLTM (datrm,qmatrix2)
```

```
-2*(lltm2$loglik-ut.rm2$loglik)
```

```
### 139.6821
```

```
## df 54 - 18 - 1
```

```
qchisq(0.99,35)
```

```
### 57.34207
```

---

---
